# Supplementary material for: Microemulsions Enhance the In Vitro Antioxidant Activity of Oleanolic Acid in RAW 264.7 Cells
Source: MDPI journal article supplement (doi:10.3390/pharmaceutics14102232), 2022-10-19
Supplement: s1 [file s1]

## Supplementary Materials

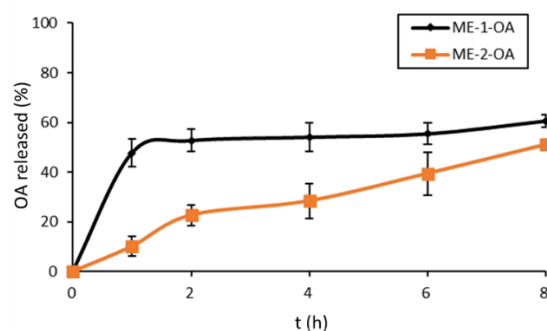

**Figure S1.** In vitro release profile of OA from the ME-1-OA and ME-2-OA in SGF (pH 1.2, 2h) and (SIF) (pH 6.8, 6 h). Each value is the mean  $\pm$  SD of three separate determinations.

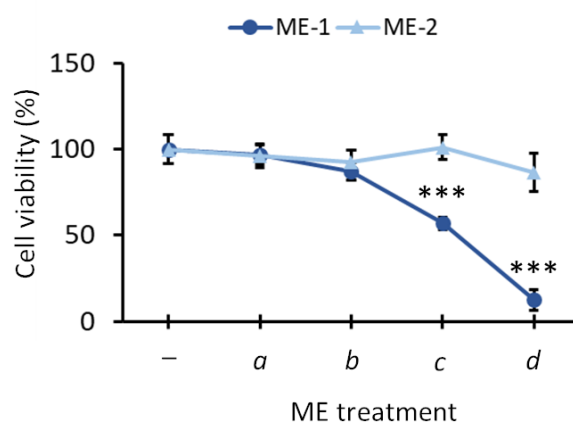

**Figure S2.** Effect of empty carriers, ME-1 and ME-2, on RAW 264.7 cell viability. MTT assay on cells starved for 6 h and then treated for 18 h with empty carriers at appropriate dilutions. For convenience ME-1 or ME-2 at dilutions corresponding to 0.05, 0.25, 0.5, 1  $\mu$ g/mL ME-1-OA or ME-2-OA are referred to here as (a), (b), (c), and (d), respectively. Values are expressed as percentages with respect to untreated control cells (-). Data are reported as mean  $\pm$  SD of three independent experiments. Tukey's test (n=3). \*\*\*  $p < 0.001$  vs. untreated control cells.

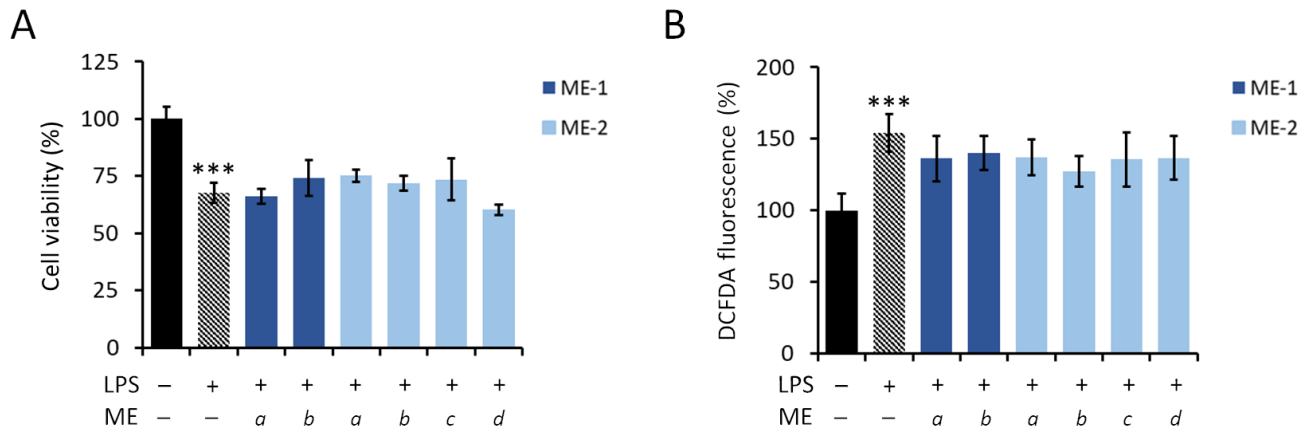

**Figure S3.** Effect of empty carriers, ME-1 and ME-2, on LPS-damaging effects in RAW264.7 cells. Cells were starved for 6 h and then treated for 18 h with empty carriers at appropriate dilutions in the presence of LPS (+). For convenience ME-1 or ME-2 at dilutions corresponding to 0.05, 0.25, 0.5, 1  $\mu\text{g/mL}$  ME-1-OA (blue bars) or ME-2-OA (light-blue bars) are referred to here as (a), (b), (c), and (d), respectively. Values are expressed as percentages with respect to untreated (-) and LPS-unstimulated (-) control cells. Data are reported as mean  $\pm$  SD of three independent experiments. Tukey's test ( $n=3$ ). \*\*\*  $p < 0.001$  vs. untreated and LPS-unstimulated control cells.
